# Supplementary material for: Autosomal STR Profiling and Databanking in Malaysia: Current Status and Future Prospects
Source: PubMed Central journal article supplement (PMC7597947; doi:10.3390/genes11101112), 2020-09-23
Supplement: genes-11-01112-s001.pdf [file genes-11-01112-s001.pdf]

**Table S1.** List of hits from FDDM by type of offences.

| <b>No.</b> | <b>Type of offense</b> | <b>Hit indices</b>          | <b>Hit year</b> |
|------------|------------------------|-----------------------------|-----------------|
| 1          | Theft vehicle          | Convicted vs. crime scene   | Mac 2019        |
| 2          | Rape                   | Convicted vs. crime scene   | Feb 2017        |
| 3          | Rape                   | Suspect vs. crime scene     | May 2012        |
| 4          | Rape                   | Suspect vs. crime scene     | Jan 2016        |
| 5          | Rape                   | Suspect vs. crime scene     | July 2016       |
| 6          | Rape                   | Convicted vs. crime scene   | Feb 2016        |
| 7          | Rape                   | Convicted vs. crime scene   | Apr 2018        |
| 8          | Rape                   | Convicted vs. crime scene   | July 2016       |
| 9          | Rape                   | Convicted vs. crime scene   | Feb 2019        |
| 10         | Robbery / Rape         | Volunteer vs. crime scene   | Apr 2019        |
| 11         | Robbery / Rape         | Convicted vs. crime scene   | Oct 2015        |
| 12         | Robbery / Rape         | Crime scene vs. crime scene | Sept 2016       |
| 13         | Robbery / Rape         | Crime scene vs. crime scene | May 2019        |
| 14         | Robbery / Rape         | Convicted vs. crime scene   | Sept 2019       |
| 15         | Robbery / Rape         | Convicted vs. crime scene   | Nov 2019        |
| 16         | Housebreaking          | Convicted vs. crime scene   | July 2016       |
| 17         | Housebreaking          | Suspect vs. crime scene     | May 2018        |
| 18         | Housebreaking          | Suspect vs. crime scene     | July 2018       |
| 19         | Housebreaking          | Suspect vs. crime scene     | Sept 2018       |
| 20         | Housebreaking          | Suspect vs. crime scene     | Sept 2018       |
| 21         | Housebreaking          | Suspect vs. crime scene     | Sept 2018       |
| 22         | Housebreaking          | Suspect vs. crime scene     | Sept 2018       |
| 23         | Housebreaking          | Suspect vs. crime scene     | Sept 2018       |
| 24         | Housebreaking          | Suspect vs. crime scene     | Oct 2018        |
| 25         | Housebreaking          | Suspect vs. crime scene     | Oct 2018        |
| 26         | Housebreaking          | Suspect vs. crime scene     | Nov 2018        |
| 27         | Housebreaking          | Suspect vs. crime scene     | Nov 2018        |
| 28         | Housebreaking          | Suspect vs. crime scene     | Nov 2018        |
| 29         | Housebreaking          | Crime scene vs. crime scene | Nov 2018        |

|    |                                   |                                |             |
|----|-----------------------------------|--------------------------------|-------------|
| 30 | Housebreaking                     | Crime scene vs. crime scene    | Apr 2018    |
| 31 | Housebreaking                     | Suspect vs. crime scene        | Jan 2019    |
| 32 | Housebreaking                     | Suspect vs. crime scene        | Mac 2019    |
| 33 | Housebreaking                     | Suspect vs. crime scene        | Apr 2019    |
| 34 | Housebreaking                     | Suspect vs. crime scene        | May 2019    |
| 35 | Housebreaking                     | Convicted vs. crime scene      | May 2019    |
| 36 | Housebreaking                     | Convicted vs. crime scene      | May 2019    |
| 37 | Housebreaking                     | Crime scene vs. crime scene    | July 2019   |
| 38 | Housebreaking                     | Crime scene vs. crime scene    | July 2019   |
| 39 | Housebreaking                     | Crime scene vs. crime scene    | July 2019   |
| 40 | Housebreaking                     | Crime scene vs. crime scene    | July 2019   |
| 41 | Housebreaking                     | Convicted vs. crime scene      | Jan 2020    |
| 42 | Possession of an unlawful firearm | Suspect vs. crime scene        | Oct 2017    |
| 43 | Possession of an unlawful firearm | Convicted vs. crime scene      | May 2019    |
| 44 | Possession of an unlawful firearm | Suspect vs. crime scene        | August 2019 |
| 45 | Gang-robbery                      | Drug Dependent vs. crime scene | July 2018   |
| 46 | Gang-robbery                      | Suspect vs. crime scene        | August 2018 |
| 47 | Gang-robbery                      | Suspect vs. crime scene        | Apr 2019    |
| 48 | Gang-robbery                      | Suspect vs. crime scene        | Apr 2019    |
| 49 | Gang-robbery                      | Suspect vs. crime scene        | Apr 2019    |
| 50 | Gang-robbery                      | Convicted vs. crime scene      | May 2019    |
| 51 | Gang-robbery                      | Suspect vs. crime scene        | August 2018 |
| 52 | Gang-robbery                      | Suspect vs. crime scene        | June 2019   |
| 53 | Gang-robbery                      | Suspect vs. crime scene        | Sept 2019   |
| 54 | Gang-robbery                      | Suspect vs. crime scene        | Nov 2015    |
| 55 | Gang-robbery                      | Volunteer vs. crime scene      | Dec 2015    |
| 56 | Gang-robbery                      | Suspect vs. crime scene        | Jan 2018    |
| 57 | Gang-robbery                      | Convicted vs. crime scene      | Oct 2017    |
| 58 | Murder                            | Suspect vs. crime scene        | Feb 2018    |
| 59 | Murder                            | Suspect vs. crime scene        | Oct 2017    |
| 60 | Murder                            | Suspect vs. crime scene        | Feb 2017    |
| 61 | Murder                            | Crime scene vs. crime scene    | May 2013    |

|    |                                                |                                |             |
|----|------------------------------------------------|--------------------------------|-------------|
| 62 | Murder                                         | Suspect vs. crime scene        | August 2019 |
| 63 | Murder                                         | Convicted vs. crime scene      | Dec 2019    |
| 64 | Identification of unidentified body            | Drug Dependent vs. crime scene | Oct 2017    |
| 65 | Identification of unidentified body            | Convicted vs. crime scene      | May 2019    |
| 66 | Identification of unidentified body            | Crime scene vs. crime scene    | May 2019    |
| 67 | Identification of unidentified body            | Suspect vs. crime scene        | Jan 2020    |
| 68 | Custody / control dangerous drugs              | Suspect vs. crime scene        | July 2019   |
| 69 | Carnal intercourse against the order of nature | Convicted vs. crime scene      | Nov 2019    |

vs. refer to a hit between DNA profiles stored in FDDM and those obtained from crime scenes, suspects, detainees, drug dependent, convicted, missing person or volunteers.

Source: data were obtained with permission from DNA Databank Division (D13), Criminal Investigation Department, Royal Malaysia Police.

**Table S2.** List of Y-STR studies in various population groups in Malaysia.

| Region                                          | Ethnicity   | Sample size (n) | Number of STR loci | PCR Amplification kit                       | Reference |
|-------------------------------------------------|-------------|-----------------|--------------------|---------------------------------------------|-----------|
| Peninsular Malaysia<br>(main ethnic group)      | Malay       | 36              | 12                 | PowerPlex® Y System (Promega)               | [37]      |
|                                                 |             | 334             | 16                 | AmpFI STR® Yfiler™ kit (Applied Biosystems) | [38]      |
|                                                 | Chinese     | 331             | 16                 | AmpFI STR® Yfiler™ kit (Applied Biosystems) | [38]      |
|                                                 | Indian      | 315             | 16                 | AmpFI STR® Yfiler™ kit (Applied Biosystems) | [38]      |
| Peninsular Malaysia<br>(Malay sub-ethnic group) | Acheh       | 7               | 15                 | AmpFI STR® Yfiler™ kit (Applied Biosystems) | [31]      |
|                                                 | Champa      | 13              | 17                 |                                             |           |
|                                                 | Rawa        | 11              | 17                 |                                             |           |
|                                                 | Kedah       | 9               | 17                 |                                             |           |
|                                                 | Minangkabau | 23              | 17                 |                                             |           |
|                                                 | Bugis       | 15              | 17                 |                                             |           |
|                                                 | Kelantan    | 43              | 17                 |                                             |           |
|                                                 | Banjar      | 18              | 17                 |                                             |           |
| Javanese                                        | 14          | 17              |                    |                                             |           |
| Peninsular Malaysia                             | Proto-Malay | 21              | 11                 | NA*                                         | [39]      |

| (Proto Malay)                                               |         |     |    |                                                              |      |
|-------------------------------------------------------------|---------|-----|----|--------------------------------------------------------------|------|
| East Malaysia - Borneo<br>(Sarawak / Sabah ethnic<br>group) | Iban    | 103 | 17 | AmpFISTR® Y-filer™ kit (Applied Biosystems)                  | [40] |
|                                                             |         | 94  | 27 | Affymetrix GeneChip Human Mapping 500K Array<br>(Affymetrix) | [12] |
|                                                             | Bidayuh | 113 | 17 | AmpFISTR® Y-filer™ kit (Applied Biosystems)                  | [40] |
|                                                             | Melanau | 104 | 17 | AmpFISTR® Y-filer™ kit (Applied Biosystems)                  | [40] |
|                                                             | Kedayan | 128 | 23 | PowerPlex® Y23 System (Promega)                              | [14] |
| Northern Peninsular<br>Malaysia – Orang Asli                | Negrito | 33  | 12 | PowerPlex® Y System (Promega)                                | [37] |
|                                                             |         | 7   | 3  | Q5 High Fidelity Kit (Biolabs)                               | [41] |
|                                                             |         | 41  | 11 | NA*                                                          | [39] |
|                                                             | Senoi   | 14  | 3  | Q5 High Fidelity Kit (Biolabs)                               | [41] |
|                                                             |         | 50  | 5  | AmpFISTR® Y-filer™ kit (Applied Biosystems)                  | [42] |
|                                                             |         | 43  | 11 | NA*                                                          | [39] |

\* PCR kit information not available.

**Table S3.** List of mtDNA studies in various population groups in Malaysia.

| Region                                     | Ethnicity | Sample size (n) | Sequencing platform                                         | Reference |
|--------------------------------------------|-----------|-----------------|-------------------------------------------------------------|-----------|
| Peninsular Malaysia<br>(main ethnic group) | Malay     | 14              | ABI 380A DNA Synthesizer (Applied Biosystems)               | [43]      |
|                                            |           | 102             | ABI PRISM® 310 (Applied Biosystems)                         | [44]      |
|                                            |           | 52              | ABI Dye Terminator Cycle Sequencing FS (Applied Biosystems) | [45]      |
|                                            |           | 15              | ABI PRISM® 377 (Applied Biosystems)                         | [46]      |
|                                            |           | 7               | Beckman-Coulter CEQ8000 (Beckman Coulter)                   | [47]      |
|                                            |           | 124             | ABI 3130 (Applied Biosystems)                               | [48]      |
|                                            |           | 248             | ABI 3130xl (Applied Biosystems)                             | [49]      |
|                                            | Chinese   | 14              | ABI 380A DNA Synthesizer (Applied Biosystems)               | [43]      |
|                                            |           | 15              | ABI PRISM® 377 (Applied Biosystems)                         | [46]      |
|                                            | Indian    | 15              | ABI PRISM® 377 (Applied Biosystems)                         | [46]      |

|                                                             |                    |                                               |                                                          |      |
|-------------------------------------------------------------|--------------------|-----------------------------------------------|----------------------------------------------------------|------|
| Peninsular Malaysia<br>(others ethnic group)                | Punjabi            | 15                                            | ABI PRISM® 377 (Applied Biosystems)                      | [46] |
| Peninsular Malaysia<br>(Malay sub-ethnic group)             | Kedah              | 24                                            | Affymetrix GeneChip Mapping Xba 50 K Arrays (Affymetrix) | [50] |
|                                                             | Minangkabau        | 20                                            |                                                          |      |
|                                                             | Bugis              | 14                                            |                                                          |      |
|                                                             | Kelantan           | 18                                            |                                                          |      |
|                                                             | Javanese           | 19                                            |                                                          |      |
| East Malaysia - Borneo<br>(Sarawak / Sabah ethnic<br>group) | Murut              | 1                                             | ABI 380A DNA Synthesizer (Applied Biosystems)            | [43] |
|                                                             |                    | 15                                            | ABI PRISM® 377 (Applied Biosystems)                      | [46] |
|                                                             |                    | 2                                             | Illumina HiSeq 2000 (Illumina)                           | [51] |
|                                                             | Kadazan -<br>Dusun | 24                                            | ABI 380A DNA Synthesizer (Applied Biosystems)            | [43] |
|                                                             |                    | 15                                            | ABI PRISM® 377 (Applied Biosystems)                      | [46] |
|                                                             |                    | 2                                             | Illumina HiSeq 2000 (Illumina)                           | [51] |
|                                                             | Iban               | 15                                            | ABI PRISM® 377 (Applied Biosystems)                      | [46] |
|                                                             | Bajau              | 15                                            | ABI PRISM® 377 (Applied Biosystems)                      | [46] |
|                                                             | Bisaya             | 2                                             | ABI 380A DNA Synthesizer (Applied Biosystems)            | [43] |
|                                                             |                    | 15                                            | ABI PRISM® 377 (Applied Biosystems)                      | [46] |
|                                                             | Orang Sungai       | 15                                            | ABI PRISM® 377 (Applied Biosystems)                      | [46] |
| Sonsogon                                                    | 1                  | Illumina HiSeq 2000 (Illumina)                | [51]                                                     |      |
| Rungus                                                      | 3                  | ABI 380A DNA Synthesizer (Applied Biosystems) | [43]                                                     |      |
|                                                             | 15                 | ABI PRISM® 377 (Applied Biosystems)           | [46]                                                     |      |
|                                                             | 1                  | Illumina HiSeq 2000 (Illumina)                | [51]                                                     |      |
| Bidayuh                                                     | 15                 | ABI PRISM® 377 (Applied Biosystems)           | [46]                                                     |      |
|                                                             | 17                 | ABI 3130xl (Applied Biosystems)               | [52]                                                     |      |
| Peninsular Malaysia – Orang<br>Asli                         | Semang             | 52                                            | ABI PRISM® 310 (Applied Biosystems)                      | [44] |
|                                                             |                    | 112                                           | Beckman-Coulter CEQ8000 (Beckman Coulter)                | [47] |
|                                                             | Jahai              | 29                                            | ABI PRISM® 310 (Applied Biosystems)                      | [44] |
|                                                             |                    | 22                                            | ABI 3130xl (Applied Biosystems)                          | [52] |
|                                                             |                    | 50                                            | Affymetrix GeneChip Mapping Xba 50 K Arrays (Affymetrix) | [50] |
|                                                             | Temuan             | 33                                            | Beckman-Coulter CEQ8000 (Beckman Coulter)                | [47] |
|                                                             |                    | 8                                             | ABI 3130xl (Applied Biosystems)                          | [52] |

|  |         |    |                                                          |      |
|--|---------|----|----------------------------------------------------------|------|
|  |         | 49 | Affymetrix GeneChip Mapping Xba 50 K Arrays (Affymetrix) | [50] |
|  | Semelai | 61 | Beckman-Coulter CEQ8000 (Beckman Coulter)                | [47] |
|  | Jakun   | 1  | ABI 380A DNA Synthesizer (Applied Biosystems)            | [43] |
|  |         | 2  | Beckman-Coulter CEQ8000 (Beckman Coulter)                | [47] |
|  | Jeni    | 2  | ABI 380A DNA Synthesizer (Applied Biosystems)            | [43] |
|  | Kensiu  | 29 | ABI PRISM® 310 (Applied Biosystems)                      | [44] |
|  |         | 30 | Affymetrix GeneChip Mapping Xba 50 K Arrays (Affymetrix) | [50] |
|  | Seletar | 21 | ABI 3130xl (Applied Biosystems)                          | [52] |
|  | Temiar  | 7  | ABI 380A DNA Synthesizer (Applied Biosystems)            | [43] |
|  | Senoi   | 52 | Beckman-Coulter CEQ8000 (Beckman Coulter)                | [47] |
|  | Bateq   | 2  | Illumina HiSeq 2000 (Illumina)                           | [51] |
|  | Mandriq | 2  | Illumina HiSeq 2000 (Illumina)                           | [51] |
|  | Semai   | 5  | ABI 380A DNA Synthesizer (Applied Biosystems)            | [43] |
|  |         | 2  | Illumina HiSeq 2000 (Illumina)                           | [51] |
